# Supplementary material
Source: PubMed Central journal article supplement (PMC4100794)
Supplement: NIHMS601181-supplement-01.pdf [file NIHMS601181-supplement-01.pdf]

## **Supplemental Methods**

### **Blood Pressure and heart rate analysis**

Systolic blood pressure and heart rate were noninvasively measured with tail-cuff technique, using a BP-2000 Blood Pressure Analysis System (Visitech Systems, Inc.) ( $n=10$  in each group). Ten readings were obtained for each experiment, and the average value was assigned to each individual mouse.

## Supplemental Table. Primer sequences used for gene expression analysis.

| Gene          | Forward                        | Reverse                        |
|---------------|--------------------------------|--------------------------------|
| <i>Adipoq</i> | 5' GGAGATGCAGGTCTTCTTGG 3'     | 5' CGAATGGGTACATTGGGAAC 3'     |
| <i>Tnf</i>    | 5' CATCTTCTCAAATTCGAGTGACAA 3' | 5' TGGGAGTAGACAAGGTACAACCC 3'  |
| <i>Il1b</i>   | 5' TGAAGTTGACGGACCCCAA 3'      | 5' TGATGTGCTGCTGTGAGATT 3'     |
| <i>Il6</i>    | 5' ACAACCACGGCCTTCCCTACTT 3'   | 5' CACGATTTCCAGAGAACATGTG 3'   |
| <i>Ccl2</i>   | 5' GGCTCAGCCAGATGCAGTTAAC 3'   | 5' GCCTACTCATTGGGATCATCTTG 3'  |
| <i>Emr1</i>   | 5' CTTTGGCTATGGGCTTCCAGTC 3'   | 5' GCAAGGAGGACAGAGTTTATCGTG 3' |
| <i>Cd68</i>   | 5' TTCTCCAGCTGTTACCTTGACCT 3'  | 5' GTTGCAAGAGAAACATGGCCCGAA 3' |
| <i>Gapdh</i>  | 5' TGTGTCCGTCGTGGATCTGA 3'     | 5' TTGCTGTTGAAGTCGCAGGAG 3'    |
| <i>Actb</i>   | 5' AGGGAAATCGTGCGTGACAT 3'     | 5' ACCGCTCGTTGCCAATAGTG 3'     |
| <i>Rplp0</i>  | 5' GCTCCAAGCAGATGCAGCA 3'      | 5' CCGGATGTGAGGCAGCAG 3'       |

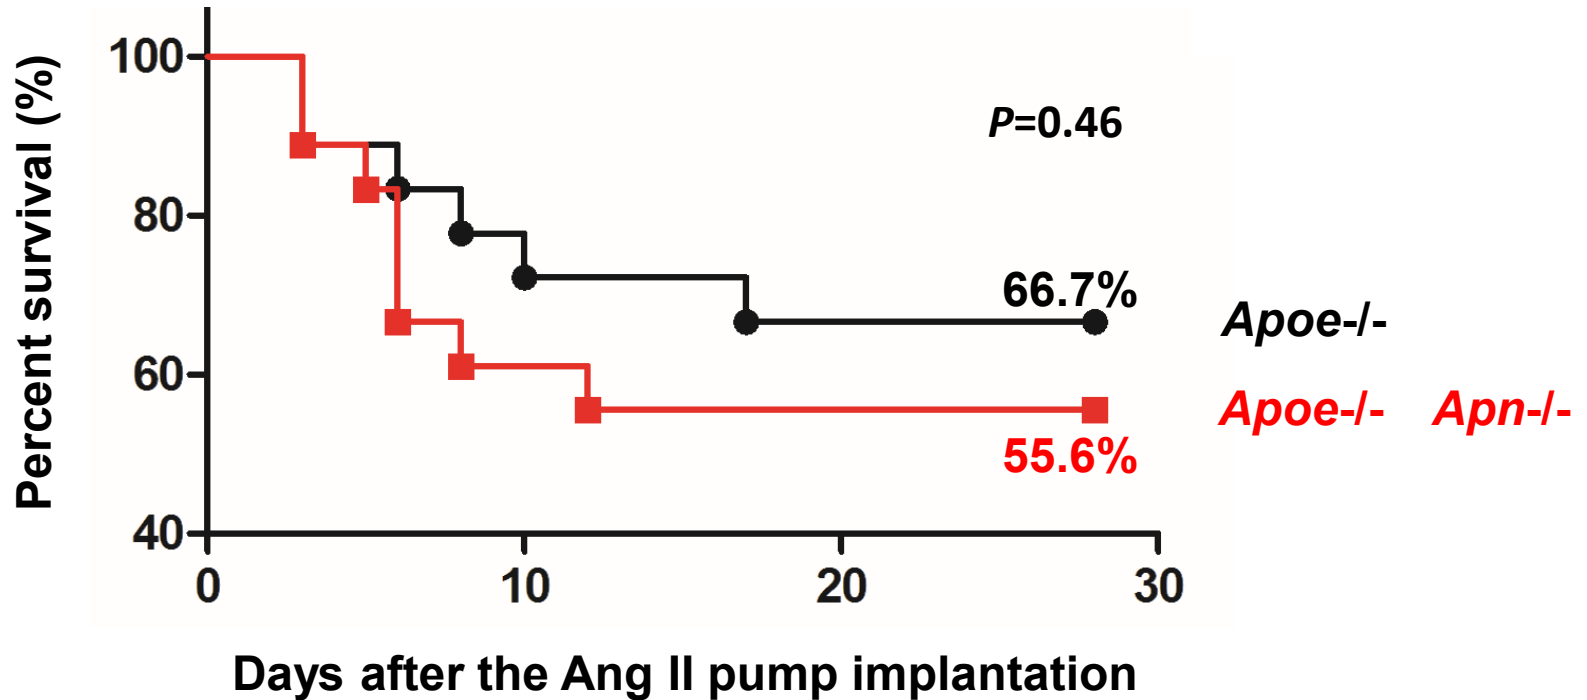

**Supplemental Figure 1.** Mouse survival rate after implantation of the pump delivered Ang II.  $n=18$  in each group.  $P=0.46$  using log-rank test.

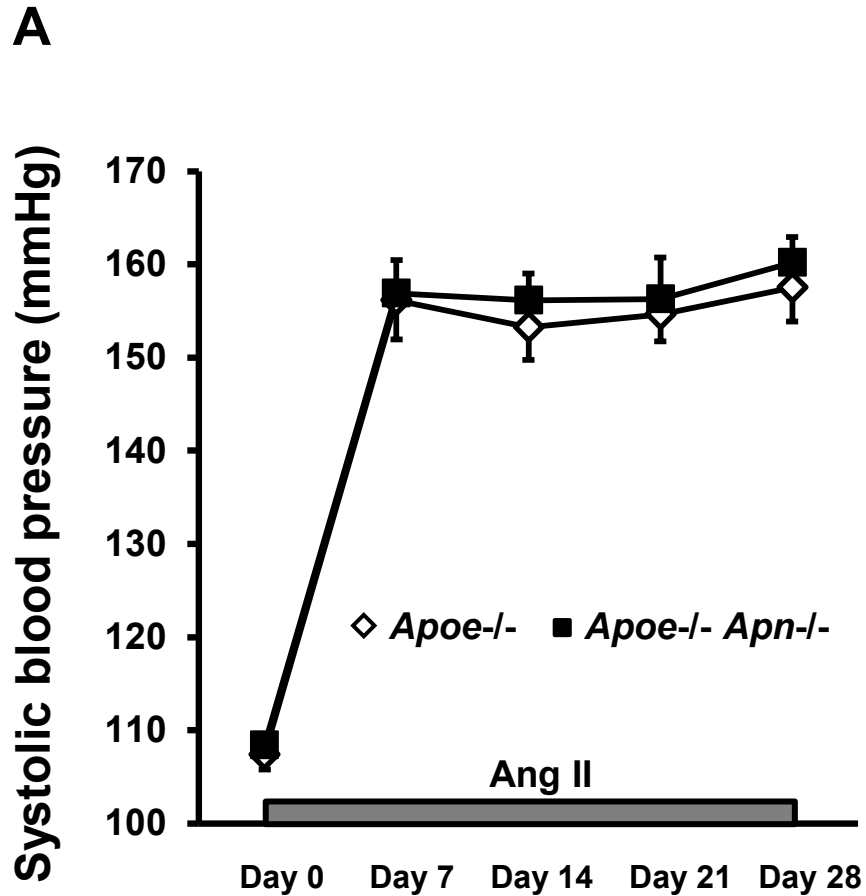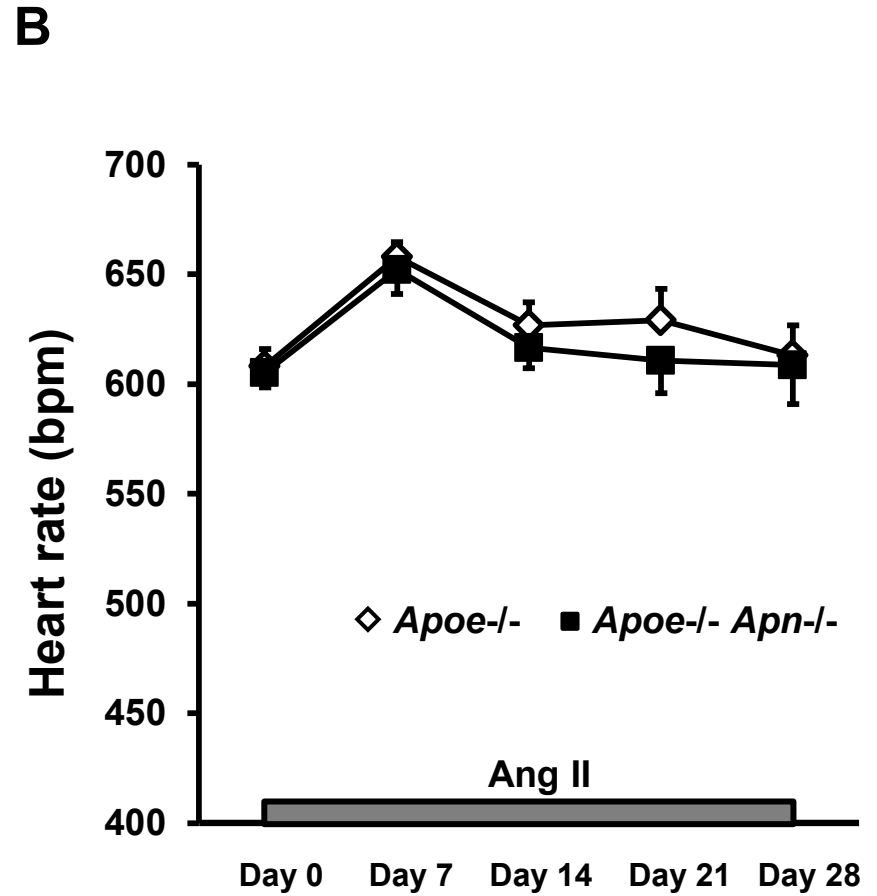

**Supplemental Figure 2.** Systolic blood pressure (**A**) and heart rate (**B**) of *Apoe*<sup>-/-</sup> and *Apoe*<sup>-/-</sup> *Apn*<sup>-/-</sup> mice before and during the period of Ang II infusion. Results are mean ± SEM. *n*=10 in each group.
